# Supplementary material for: The dynamic and stress-adaptive signaling hub of 14-3-3: emerging mechanisms of regulation and context-dependent protein–protein interactions
Source: PubMed Central journal article supplement (PMC6193947; doi:10.1038/s41388-018-0348-3), 2018-06-18
Supplement: 41388_2018_348_MOESM1_ESM.pdf [file 41388_2018_348_MOESM1_ESM.pdf]

| Category        | Column                                | Description                                                                                                         |
|-----------------|---------------------------------------|---------------------------------------------------------------------------------------------------------------------|
| SAPH-ire        | RANK                                  | MAP rank order based on SAPH-ire FPx                                                                                |
| SAPH-ire        | MAP                                   | Modified Alignment Position                                                                                         |
| SAPH-ire        | Family                                | Interpro Family ID                                                                                                  |
| SAPH-ire        | Mem                                   | Number of UIDs within the family alignment                                                                          |
| SAPH-ire        | AP                                    | Alignment Position                                                                                                  |
| SAPH-ire        | MAP PTMs                              | List of PTM types found in the MAP                                                                                  |
| SAPH-ire        | PTMc                                  | Number of members with observed modification within the MAP                                                         |
| SAPH-ire        | PTMc/Mem                              | PTMc normalized as a function of total members within the MAP (gaps excluded)                                       |
| SAPH-ire        | OBSrc                                 | observation count (number of observations from literature and high throughput proteomics)                           |
| SAPH-ire        | PRC                                   | PTM residue conservation                                                                                            |
| SAPH-ire        | DIS                                   | Disorder tendency (from IUPred)                                                                                     |
| SAPH-ire        | Nc                                    | Neighbor Count (number of MAPs within a +/-2 alignment position window)                                             |
| SAPH-ire        | KNc                                   | Known Neighbor Count (number of MAPs with at least one known functional PTM within +/- 2 alignment position window) |
| SAPH-ire        | NPTMc                                 | Neighbor PTM count (count of PTMs observed within a +/-2 alignment position window)                                 |
| SAPH-ire        | OIDc                                  | Sum of unique organism UIDs within the MAP                                                                          |
| SAPH-ire        | Cc                                    | Sum of PTMs observed within +/- 2 alignment position window (including the MAP in question)                         |
| SAPH-ire        | Known                                 | Binary classifier of known functional status of a MAP                                                               |
| SAPH-ire        | KFSC                                  | Known Function Source Count (sum of PMID's demonstrating functional impact for any PTM within the MAP)              |
| SAPH-ire        | SAPH-ireFPx Score (rel to Family Max) | Probability score from SAPH-ire (Normalized to the family maximum value)                                            |
| PTM Data        | P63104 Aligned Native Position        | The aligned native position of P63104 within the MAP                                                                |
| PTM Data        | P63104 Resi                           | Residue of P63104                                                                                                   |
| PTM Data        | P63104 PTM                            | PTM type for P63104 at this site (may be redundant for multiple PTMs observed on the same residue)                  |
| PTM Data        | Database                              | PTM database                                                                                                        |
| PTM Data        | Reference                             | Reference data (if available)                                                                                       |
| Functional Data | Functional in P63104?                 | PTM of P63104 has been shown to be functional                                                                       |
| Functional Data | P63104 Functional Native Position     | PSP-curated data for known function                                                                                 |
| Functional Data | P63104 Functional PTM                 | PSP-curated data for known function                                                                                 |
| Functional Data | GENE                                  | PSP-curated data for known function                                                                                 |
| Functional Data | PROTEIN                               | PSP-curated data for known function                                                                                 |
| Functional Data | SITE_+/-7_AA                          | PSP-curated data for known function                                                                                 |
| Functional Data | DOMAIN                                | PSP-curated data for known function                                                                                 |
| Functional Data | ON_FUNCTION                           | PSP-curated data for known function                                                                                 |
| Functional Data | ON_PROCESS                            | PSP-curated data for known function                                                                                 |
| Functional Data | ON_PROT_INTERACT                      | PSP-curated data for known function                                                                                 |
| Functional Data | ON_OTHER_INTERACT                     | PSP-curated data for known function                                                                                 |
| Functional Data | PMIDs                                 | PSP-curated data for known function                                                                                 |
