# Supplementary material for: The dynamic and stress-adaptive signaling hub of 14-3-3: emerging mechanisms of regulation and context-dependent protein–protein interactions
Source: PubMed Central journal article supplement (PMC6193947; doi:10.1038/s41388-018-0348-3), 2018-06-18
Supplement: 41388_2018_348_MOESM2_ESM.pdf [file 41388_2018_348_MOESM2_ESM.pdf]

|     |               |           |    |     |                                 |   |             |   |            |            |   |   |    |    |    |   |   |             |            |   |
|-----|---------------|-----------|----|-----|---------------------------------|---|-------------|---|------------|------------|---|---|----|----|----|---|---|-------------|------------|---|
| 90  | IPRO00308-117 | IPRO00308 | 37 | 117 | Nitration;Phosphorylation       | 2 | 0.054054054 | 1 | 0.30555556 | 0.09416667 | 1 | 0 | 7  | 12 | 9  | 0 | 0 | 0.839455489 | P63104-104 | F |
| 91  | IPRO00308-248 | IPRO00308 | 37 | 248 | Phosphorylation;Phosphorylation | 2 | 0.054054054 | 2 | 0.10810811 | 0.57216216 | 1 | 1 | 5  | 12 | 7  | 0 | 0 | 0.837512982 | P63104-233 | Q |
| 92  | IPRO00308-109 | IPRO00308 | 37 | 109 | Phosphorylation                 | 1 | 0.027027027 | 2 | 0.11111111 | 0.06083333 | 2 | 0 | 10 | 12 | 11 | 0 | 0 | 0.732576817 | P63104-96  | D |
| 93  | IPRO00308-7   | IPRO00308 | 37 | 7   | Acetylation                     | 1 | 0.027027027 | 1 | 1          | 0.88333333 | 2 | 0 | 11 | 11 | 12 | 0 | 0 | 0.730493098 |            |   |
| 94  | IPRO00308-125 | IPRO00308 | 37 | 125 | Phosphorylation                 | 1 | 0.027027027 | 2 | 0.08333333 | 0.08861111 | 3 | 0 | 9  | 12 | 10 | 0 | 0 | 0.69157603  | P63104-112 | A |
| 95  | IPRO00308-32  | IPRO00308 | 37 | 32  | Phosphorylation                 | 1 | 0.027027027 | 2 | 0.10810811 | 0.38810811 | 1 | 0 | 5  | 12 | 6  | 0 | 0 | 0.600443693 | P63104-24  | A |
| 96  | IPRO00308-13  | IPRO00308 | 37 | 13  | Phosphorylation                 | 1 | 0.027027027 | 1 | 0.08108108 | 0.61567568 | 2 | 0 | 15 | 12 | 16 | 0 | 0 | 0.524528817 | P63104-5   | E |
| 97  | IPRO00308-190 | IPRO00308 | 37 | 190 | Phosphorylation                 | 1 | 0.027027027 | 1 | 1          | 0.01648649 | 1 | 0 | 1  | 12 | 2  | 0 | 0 | 0.518818056 | P63104-175 | S |
| 98  | IPRO00308-51  | IPRO00308 | 37 | 51  | Methylation                     | 1 | 0.027027027 | 1 | 1          | 0.27837838 | 0 | 0 | 0  | 12 | 1  | 0 | 0 | 0.492826868 | P63104-41  | R |
| 99  | IPRO00308-97  | IPRO00308 | 37 | 97  | Phosphorylation                 | 1 | 0.027027027 | 1 | 0.11111111 | 0.24416667 | 2 | 0 | 11 | 12 | 12 | 0 | 0 | 0.458923839 | P63104-84  | E |
| 100 | IPRO00308-124 | IPRO00308 | 37 | 124 | Phosphorylation                 | 1 | 0.027027027 | 1 | 0.27777778 | 0.07333333 | 3 | 0 | 8  | 12 | 9  | 0 | 0 | 0.458596532 | P63104-111 | Q |
| 101 | IPRO00308-48  | IPRO00308 | 37 | 48  | 5-Nitrosylation                 | 1 | 0.027027027 | 1 | 0.05405405 | 0.26648649 | 1 | 0 | 10 | 12 | 11 | 0 | 0 | 0.426302426 | P63104-38  | N |
| 102 | IPRO00308-159 | IPRO00308 | 37 | 159 | Phosphorylation                 | 1 | 0.027027027 | 1 | 0.24324324 | 0.39243243 | 1 | 0 | 3  | 12 | 4  | 0 | 0 | 0.338302921 | P63104-144 | Q |
| 103 | IPRO00308-94  | IPRO00308 | 37 | 94  | Phosphorylation                 | 1 | 0.027027027 | 1 | 0.08108108 | 0.32297297 | 2 | 0 | 5  | 12 | 6  | 0 | 0 | 0.33802711  | P63104-81  | E |
| 104 | IPRO00308-39  | IPRO00308 | 37 | 39  | Phosphorylation                 | 1 | 0.027027027 | 1 | 0.10810811 | 0.35297297 | 2 | 0 | 3  | 12 | 4  | 0 | 0 | 0.311245454 | P63104-31  | E |
| 105 | IPRO00308-40  | IPRO00308 | 37 | 40  | Acetylation                     | 1 | 0.027027027 | 1 | 0.05405405 | 0.33702703 | 2 | 0 | 3  | 12 | 4  | 0 | 0 | 0.301444697 | P63104-32  | Q |
| 106 | IPRO00308-252 | IPRO00308 | 37 | 252 | Phosphorylation                 | 1 | 0.027027027 | 1 | 0.07692308 | 0.57615385 | 1 | 0 | 1  | 7  | 2  | 0 | 0 | 0.290038696 |            |   |
| 107 | IPRO00308-251 | IPRO00308 | 37 | 251 | Phosphorylation                 | 1 | 0.027027027 | 1 | 0.07142857 | 0.565      | 1 | 0 | 1  | 7  | 2  | 0 | 0 | 0.289072834 |            |   |
| 108 | IPRO00308-282 | IPRO00308 | 37 | 282 | Phosphorylation                 | 1 | 0.027027027 | 1 | 0.05555556 | 0.96611111 | 1 | 0 | 2  | 12 | 3  | 0 | 0 | 0.287635714 | P63104-244 | E |
| 109 | IPRO00308-279 | IPRO00308 | 37 | 279 | Phosphorylation                 | 1 | 0.027027027 | 1 | 0.05405405 | 0.91405405 | 0 | 0 | 0  | 12 | 1  | 0 | 0 | 0.263642489 | P63104-241 | E |
