# Supplementary material for: The dynamic and stress-adaptive signaling hub of 14-3-3: emerging mechanisms of regulation and context-dependent protein–protein interactions
Source: PubMed Central journal article supplement (PMC6193947; doi:10.1038/s41388-018-0348-3), 2018-06-18
Supplement: 41388_2018_348_MOESM3_ESM.pdf [file 41388_2018_348_MOESM3_ESM.pdf]

| MAP          | Family    | UID-NP    | UID    | NP | AP | UniProt name | OID                      | Length | Resi | Native PTM      | Database         | Reference | Resi_P SPfxn | PTM_PSPfxn | GENE_PSPfxn | PROTEIN_P SPfxn | PROT_TYPE_PSPfxn | GENE_ID_PSPfxn | HU_CHR_LOC_PSPfxn | ORGANISM_PSPfxn | SITE_G RP_ID_PSPfxn | SITE_+/-_7_AA_PSPfxn | DOMAIN_PSPfxn | ON_FUNCTION_PSPfxn | ON_PROCESS_PSPfxn | ON_PROT_INTERACT_PSPfxn | ON_OTHER_INTERACT_PSPfxn | PMIDs_PSPfxn | NOTES_PSPfxn |  |
|--------------|-----------|-----------|--------|----|----|--------------|--------------------------|--------|------|-----------------|------------------|-----------|--------------|------------|-------------|-----------------|------------------|----------------|-------------------|-----------------|---------------------|----------------------|---------------|--------------------|-------------------|-------------------------|--------------------------|--------------|--------------|--|
| IPR000308-2  | IPR000308 | P46077-2  | P46077 | 2  | 2  | 14334_ARATH  | Arabidopsis thaliana     | 267    | A    | Acetylation     | Uniport_201509   | 22223895  |              |            |             |                 |                  |                |                   |                 |                     |                      |               |                    |                   |                         |                          |              |              |  |
| IPR000308-3  | IPR000308 | P42643-2  | P42643 | 1  | 3  | 14331_ARATH  | Arabidopsis thaliana     | 267    | A    | Acetylation     | Uniport_201509   | 22223895  |              |            |             |                 |                  |                |                   |                 |                     |                      |               |                    |                   |                         |                          |              |              |  |
| IPR000308-7  | IPR000308 | P31946-1  | P31946 | 1  | 7  | 14338_HUMAN  | Homo sapiens             | 246    | M    | Acetylation     | Uniport_201509   | 22814378  |              |            |             |                 |                  |                |                   |                 |                     |                      |               |                    |                   |                         |                          |              |              |  |
| IPR000308-8  | IPR000308 | P29311-2  | P29311 | 2  | 8  | BMH1_YEAST   | Saccharomyces cerevisiae | 267    | S    | Acetylation     | Uniport_201509   | 9298649   |              |            |             |                 |                  |                |                   |                 |                     |                      |               |                    |                   |                         |                          |              |              |  |
| IPR000308-8  | IPR000308 | P31946-2  | P31946 | 2  | 8  | 14338_HUMAN  | Homo sapiens             | 246    | T    | Acetylation     | Uniport_201509   | 22814378  |              |            |             |                 |                  |                |                   |                 |                     |                      |               |                    |                   |                         |                          |              |              |  |
| IPR000308-8  | IPR000308 | P31946-2  | P31946 | 2  | 8  | 14338_HUMAN  | Homo sapiens             | 246    | T    | Phosphorylation | Uniport_201509   | 22814378  |              |            |             |                 |                  |                |                   |                 |                     |                      |               |                    |                   |                         |                          |              |              |  |
| IPR000308-8  | IPR000308 | P34730-2  | P34730 | 2  | 8  | BMH2_YEAST   | Saccharomyces cerevisiae | 273    | S    | Acetylation     | Uniport_201509   | 9298649   |              |            |             |                 |                  |                |                   |                 |                     |                      |               |                    |                   |                         |                          |              |              |  |
| IPR000308-8  | IPR000308 | P41932-2  | P41932 | 2  | 8  | 14331_CAEEL  | Caenorhabditis elegans   | 248    | S    | Phosphorylation | PhosphoELM.10011 | 19530675  |              |            |             |                 |                  |                |                   |                 |                     |                      |               |                    |                   |                         |                          |              |              |  |
| IPR000308-8  | IPR000308 | P62258-1  | P62258 | 1  | 8  | 1433E_HUMAN  | Homo sapiens             | 255    | M    | Acetylation     | Uniport_201509   | 19413330  |              |            |             |                 |                  |                |                   |                 |                     |                      |               |                    |                   |                         |                          |              |              |  |
| IPR000308-8  | IPR000308 | Q9CQV8-2  | Q9CQV8 | 2  | 8  | 1433B_MOUSE  | Mus musculus             | 246    | T    | Phosphorylation | Uniport_201509   | 19608861  |              |            |             |                 |                  |                |                   |                 |                     |                      |               |                    |                   |                         |                          |              |              |  |
| IPR000308-9  | IPR000308 | P27348-1  | P27348 | 1  | 9  | 1433T_HUMAN  | Homo sapiens             | 245    | M    | Acetylation     | Uniport_201509   | 1317796   |              |            |             |                 |                  |                |                   |                 |                     |                      |               |                    |                   |                         |                          |              |              |  |
| IPR000308-9  | IPR000308 | P29361-1  | P29361 | 1  | 9  | 1433Z_SHEEP  | Ovis aries               | 245    | M    | Acetylation     | Uniport_201509   | 1317796   |              |            |             |                 |                  |                |                   |                 |                     |                      |               |                    |                   |                         |                          |              |              |  |
| IPR000308-9  | IPR000308 | P61981-2  | P61981 | 2  | 9  | 1433G_HUMAN  | Homo sapiens             | 247    | V    | Acetylation     | Uniport_201509   | 14534293  |              |            |             |                 |                  |                |                   |                 |                     |                      |               |                    |                   |                         |                          |              |              |  |
| IPR000308-9  | IPR000308 | P63104-1  | P63104 | 1  | 9  | 1433Z_HUMAN  | Homo sapiens             | 245    | M    | Acetylation     | Uniport_201509   | 19608861  |              |            |             |                 |                  |                |                   |                 |                     |                      |               |                    |                   |                         |                          |              |              |  |
| IPR000308-11 | IPR000308 | P27348-3  | P27348 | 3  | 11 | 1433T_HUMAN  | Homo sapiens             | 245    | K    | Acetylation     | Uniport_201509   | 19608861  |              |            |             |                 |                  |                |                   |                 |                     |                      |               |                    |                   |                         |                          |              |              |  |
| IPR000308-11 | IPR000308 | P27348-3  | P27348 | 3  | 11 | 1433T_HUMAN  | Homo sapiens             | 245    | K    | Ubiquitination  | Uniport_201509   | 19608861  |              |            |             |                 |                  |                |                   |                 |                     |                      |               |                    |                   |                         |                          |              |              |  |
| IPR000308-11 | IPR000308 | P31946-5  | P31946 | 5  | 11 | 1433B_HUMAN  | Homo sapiens             | 246    | K    | Acetylation     | Uniport_201509   | 19608861  |              |            |             |                 |                  |                |                   |                 |                     |                      |               |                    |                   |                         |                          |              |              |  |
| IPR000308-11 | IPR000308 | P31946-5  | P31946 | 5  | 11 | 1433B_HUMAN  | Homo sapiens             | 246    | K    | Ubiquitination  | Uniport_201509   | 19608861  |              |            |             |                 |                  |                |                   |                 |                     |                      |               |                    |                   |                         |                          |              |              |  |
| IPR000308-11 | IPR000308 | P31946-5  | P31946 | 5  | 11 | 1433B_HUMAN  | Homo sapiens             | 246    | K    | Ubiquitination  | Uniport_201509   | 19608861  |              |            |             |                 |                  |                |                   |                 |                     |                      |               |                    |                   |                         |                          |              |              |  |
| IPR000308-11 | IPR000308 | P35213-5  | P35213 | 5  | 11 | 1433B_RAT    | Rattus norvegicus        | 246    | K    | Acetylation     | Uniport_201509   | 19608861  |              |            |             |                 |                  |                |                   |                 |                     |                      |               |                    |                   |                         |                          |              |              |  |
| IPR000308-11 | IPR000308 | P62258-4  | P62258 | 4  | 11 | 1433E_HUMAN  | Homo sapiens             | 255    | R    | Methylation     | Uniport_201509   | 19608861  |              |            |             |                 |                  |                |                   |                 |                     |                      |               |                    |                   |                         |                          |              |              |  |
| IPR000308-11 | IPR000308 | P63101-3  | P63101 | 3  | 11 | 1433Z_MOUSE  | Mus musculus             | 245    | K    | Acetylation     | Uniport_201509   | 19608861  |              |            |             |                 |                  |                |                   |                 |                     |                      |               |                    |                   |                         |                          |              |              |  |
| IPR000308-11 | IPR000308 | P63102-3  | P63102 | 3  | 11 | 1433Z_RAT    | Rattus norvegicus        | 245    | K    | Acetylation     | Uniport_201509   | 19608861  |              |            |             |                 |                  |                |                   |                 |                     |                      |               |                    |                   |                         |                          |              |              |  |
| IPR000308-11 | IPR000308 | P63104-3  | P63104 | 3  | 11 | 1433Z_HUMAN  | Homo sapiens             | 245    | K    | Acetylation     | Uniport_201509   | 19608861  |              |            |             |                 |                  |                |                   |                 |                     |                      |               |                    |                   |                         |                          |              |              |  |
| IPR000308-11 | IPR000308 | P63104-3  | P63104 | 3  | 11 | 1433Z_HUMAN  | Homo sapiens             | 245    | K    | Methylation     | Uniport_201509   | 19608861  |              |            |             |                 |                  |                |                   |                 |                     |                      |               |                    |                   |                         |                          |              |              |  |
| IPR000308-11 | IPR000308 | P63104-3  | P63104 | 3  | 11 | 1433Z_HUMAN  | Homo sapiens             | 245    | K    | Ubiquitination  | Uniport_201509   | 19608861  |              |            |             |                 |                  |                |                   |                 |                     |                      |               |                    |                   |                         |                          |              |              |  |
| IPR000308-11 | IPR000308 | P68254-3  | P68254 | 3  | 11 | 1433T_MOUSE  | Mus musculus             | 245    | K    | Acetylation     | Uniport_201509   | 19608861  |              |            |             |                 |                  |                |                   |                 |                     |                      |               |                    |                   |                         |                          |              |              |  |
| IPR000308-11 | IPR000308 | Q9CQV8-5  | Q9CQV8 | 5  | 11 | 1433B_MOUSE  | Mus musculus             | 246    | K    | Acetylation     | Uniport_201509   | 19608861  |              |            |             |                 |                  |                |                   |                 |                     |                      |               |                    |                   |                         |                          |              |              |  |
| IPR000308-12 | IPR000308 | P31946-6  | P31946 | 6  | 12 | 1433B_HUMAN  | Homo sapiens             | 246    | S    | Phosphorylation | Uniport_201509   | 19608861  |              |            |             |                 |                  |                |                   |                 |                     |                      |               |                    |                   |                         |                          |              |              |  |
| IPR000308-12 | IPR000308 | Q9CQV8-6  | Q9CQV8 | 6  | 12 | 1433B_MOUSE  | Mus musculus             | 246    | S    | Phosphorylation | Uniport_201509   | 19608861  |              |            |             |                 |                  |                |                   |                 |                     |                      |               |                    |                   |                         |                          |              |              |  |
| IPR000308-13 | IPR000308 | P31947-5  | P31947 | 5  | 13 | 1433S_HUMAN  | Homo sapiens             | 248    | S    | Phosphorylation | Uniport_201509   | 19608861  |              |            |             |                 |                  |                |                   |                 |                     |                      |               |                    |                   |                         |                          |              |              |  |
| IPR000308-16 | IPR000308 | P62259-9  | P62259 | 9  | 16 | 1433E_MOUSE  | Mus musculus             | 255    | Y    | Phosphorylation | Uniport_201509   | 19608861  |              |            |             |                 |                  |                |                   |                 |                     |                      |               |                    |                   |                         |                          |              |              |  |
| IPR000308-17 | IPR000308 | P27348-9  | P27348 | 9  | 17 | 1433T_HUMAN  | Homo sapiens             | 245    | K    | Acetylation     | Uniport_201509   | 19608861  |              |            |             |                 |                  |                |                   |                 |                     |                      |               |                    |                   |                         |                          |              |              |  |
| IPR000308-17 | IPR000308 | P27348-9  | P27348 | 9  | 17 | 1433T_HUMAN  | Homo sapiens             | 245    | K    | Ubiquitination  | Uniport_201509   | 19608861  |              |            |             |                 |                  |                |                   |                 |                     |                      |               |                    |                   |                         |                          |              |              |  |
| IPR000308-17 | IPR000308 | P31946-11 | P31946 | 11 | 17 | 1433B_HUMAN  | Homo sapiens             | 246    | K    | Ubiquitination  | Uniport_201509   | 19608861  |              |            |             |                 |                  |                |                   |                 |                     |                      |               |                    |                   |                         |                          |              |              |  |
| IPR000308-17 | IPR000308 | P35213-11 | P35213 | 11 | 17 | 1433B_RAT    | Rattus norvegicus        | 246    | K    | Acetylation     | Uniport_201509   | 19608861  |              |            |             |                 |                  |                |                   |                 |                     |                      |               |                    |                   |                         |                          |              |              |  |
| IPR000308-17 | IPR000308 | P35213-11 | P35213 | 11 | 17 | 1433B_RAT    | Rattus norvegicus        | 246    | K    | Ubiquitination  | Uniport_201509   | 19608861  |              |            |             |                 |                  |                |                   |                 |                     |                      |               |                    |                   |                         |                          |              |              |  |
| IPR000308-17 | IPR000308 | P61981-10 | P61981 | 10 | 17 | 1433G_HUMAN  | Homo sapiens             | 247    | K    | Ubiquitination  | Uniport_201509   | 19608861  |              |            |             |                 |                  |                |                   |                 |                     |                      |               |                    |                   |                         |                          |              |              |  |
| IPR000308-17 | IPR000308 | P61982-10 | P61982 | 10 | 17 | 1433G_MOUSE  | Mus musculus             | 247    | K    | Ubiquitination  | Uniport_201509   | 19608861  |              |            |             |                 |                  |                |                   |                 |                     |                      |               |                    |                   |                         |                          |              |              |  |
| IPR000308-17 | IPR000308 | P63101-9  | P63101 | 9  | 17 | 1433Z_MOUSE  | Mus musculus             | 245    | K    | Ubiquitination  | Uniport_201509   | 19608861  |              |            |             |                 |                  |                |                   |                 |                     |                      |               |                    |                   |                         |                          |              |              |  |
| IPR000308-17 | IPR000308 | P63102-9  | P63102 | 9  | 17 | 1433Z_RAT    | Rattus norvegicus        | 245    | K    | Acetylation     | Uniport_201509   | 19608861  |              |            |             |                 |                  |                |                   |                 |                     |                      |               |                    |                   |                         |                          |              |              |  |
| IPR000308-17 | IPR000308 | P63102-9  | P63102 | 9  | 17 | 1433Z_RAT    | Rattus norvegicus        | 245    | K    | Ubiquitination  | Uniport_201509   | 19608861  |              |            |             |                 |                  |                |                   |                 |                     |                      |               |                    |                   |                         |                          |              |              |  |
| IPR000308-17 | IPR000308 | P63104-9  | P63104 | 9  | 17 | 1433Z_HUMAN  | Homo sapiens             | 245    | K    | Acetylation     | Uniport_201509   | 19608861  |              |            |             |                 |                  |                |                   |                 |                     |                      |               |                    |                   |                         |                          |              |              |  |
| IPR000308-17 | IPR000308 | P63104-9  | P63104 | 9  | 17 | 1433Z_HUMAN  | Homo sapiens             | 245    | K    | Ubiquitination  | Uniport_201509   | 19608861  |              |            |             |                 |                  |                |                   |                 |                     |                      |               |                    |                   |                         |                          |              |              |  |
| IPR000308-17 | IPR000308 | P68254-9  | P68254 | 9  | 17 | 1433T_MOUSE  | Mus musculus             | 245    | K    | Ubiquitination  | Uniport_201509   | 19608861  |              |            |             |                 |                  |                |                   |                 |                     |                      |               |                    |                   |                         |                          |              |              |  |
| IPR000308-17 | IPR000308 | Q9CQV8-11 | Q9CQV8 | 11 | 17 | 1433B_MOUSE  | Mus musculus             | 246    | K    | Ubiquitination  | Uniport_201509   | 19608861  |              |            |             |                 |                  |                |                   |                 |                     |                      |               |                    |                   |                         |                          |              |              |  |
| IPR000308-19 | IPR000308 | O70456-11 | O70456 | 11 | 19 | 1433S_MOUSE  | Mus musculus             | 248    | K    | Ubiquitination  | Uniport_201509   | 19608861  |              |            |             |                 |                  |                |                   |                 |                     |                      |               |                    |                   |                         |                          |              |              |  |
| IPR000308-19 | IPR000308 | P27348-11 | P27348 | 11 | 19 | 1433T_HUMAN  | Homo sapiens             | 245    | K    | Acetylation     | Uniport_201509   | 19608861  |              |            |             |                 |                  |                |                   |                 |                     |                      |               |                    |                   |                         |                          |              |              |  |
| IPR000308-19 | IPR000308 | P27348-11 | P27348 | 11 | 19 | 1433T_HUMAN  | Homo sapiens             | 245    | K    | Ubiquitination  | Uniport_201509   | 19608861  |              |            |             |                 |                  |                |                   |                 |                     |                      |               |                    |                   |                         |                          |              |              |  |
| IPR000308-19 | IPR000308 | P31946-13 | P31946 | 13 | 19 | 1433B_HUMAN  | Homo sapiens             | 246    | K    | Acetylation     | Uniport_201509   | 19608861  |              |            |             |                 |                  |                |                   |                 |                     |                      |               |                    |                   |                         |                          |              |              |  |
| IPR000308-19 | IPR000308 | P31946-13 | P31946 | 13 | 19 | 1433B_HUMAN  | Homo sapiens             | 246    | K    | Ubiquitination  | Uniport_201509   | 19608861  |              |            |             |                 |                  |                |                   |                 |                     |                      |               |                    |                   |                         |                          |              |              |  |
| IPR000308-19 | IPR000308 | P31947-11 | P31947 | 11 | 19 | 1433S_HUMAN  | Homo sapiens             | 248    | K    | Acetylation     | Uniport_201509   | 19608861  |              |            |             |                 |                  |                |                   |                 |                     |                      |               |                    |                   |                         |                          |              |              |  |
| IPR000308-19 | IPR000308 | P31947-11 | P31947 | 11 | 19 | 1433S_HUMAN  | Homo sapiens             | 248    | K    | Ubiquitination  | Uniport_201509   | 19608861  |              |            |             |                 |                  |                |                   |                 |                     |                      |               |                    |                   |                         |                          |              |              |  |
| IPR000308-19 | IPR000308 | P35213-13 | P35213 | 13 | 19 | 1433B_RAT    | Rattus norvegicus        | 246    | K    | Acetylation     | Uniport_201509   | 19608861  |              |            |             |                 |                  |                |                   |                 |                     |                      |               |                    |                   |                         |                          |              |              |  |
| IPR000308-19 | IPR000308 | P35213-13 | P35213 | 13 | 19 | 1433B_RAT    | Rattus norvegicus        | 246    | K    | Ubiquitination  | Uniport_201509   | 19608861  |              |            |             |                 |                  |                |                   |                 |                     |                      |               |                    |                   |                         |                          |              |              |  |
| IPR000308-19 | IPR000308 | P62258-12 | P62258 | 12 | 19 | 1433E_HUMAN  | Homo sapiens             | 255    | K    | Acetylation     | Uniport_201509   | 19608861  |              |            |             |                 |                  |                |                   |                 |                     |                      |               |                    |                   |                         |                          |              |              |  |
| IPR000308-19 | IPR000308 | P62258-12 | P62258 | 12 | 19 | 1433E_HUMAN  | Homo sapiens             | 255    | K    | Ubiquitination  | Uniport_201509   | 19608861  |              |            |             |                 |                  |                |                   |                 |                     |                      |               |                    |                   |                         |                          |              |              |  |
| IPR000308-19 | IPR000308 | P62259-12 |        |    |    |              |                          |        |      |                 |                  |           |              |            |             |                 |                  |                |                   |                 |                     |                      |               |                    |                   |                         |                          |              |              |  |
