# Supplementary material for: The dynamic and stress-adaptive signaling hub of 14-3-3: emerging mechanisms of regulation and context-dependent protein–protein interactions
Source: PubMed Central journal article supplement (PMC6193947; doi:10.1038/s41388-018-0348-3), 2018-06-18
Supplement: 41388_2018_348_MOESM5_ESM.pdf [file 41388_2018_348_MOESM5_ESM.pdf]

| Table 1. Validated stress-induced 14-3-3 interacting proteins |                          |                                      |                                               |                                                                                                                                                                                      |                                                |                                                            |                                                                                                                                                                                                                        |
|---------------------------------------------------------------|--------------------------|--------------------------------------|-----------------------------------------------|--------------------------------------------------------------------------------------------------------------------------------------------------------------------------------------|------------------------------------------------|------------------------------------------------------------|------------------------------------------------------------------------------------------------------------------------------------------------------------------------------------------------------------------------|
| Condition                                                     | Interacting protein      | 14-3-3-binding phosphosite(s)        | 14-3-3 isoform(s)                             | Effect of 14-3-3 binding                                                                                                                                                             | Kinase                                         | Phosphatase                                                | Reference(s)                                                                                                                                                                                                           |
| Insulin/ glucose                                              | AS160                    | T649 (Mouse), T642 (Human)           | ζ                                             | allows Glut4 trafficking to the plasma membrane                                                                                                                                      | AKT                                            | PP1A                                                       | Ramm et al. 2006, Howlett et al. 2007, Dubois et al. 2009, Mortenson et al. 2015, Sharma et al. 2016                                                                                                                   |
|                                                               | Bad                      | S136, S112                           | ζ                                             | sequesters Bad away from Bcl-xL and Bcl-2 to allow Bax/Bak activation and MOMP                                                                                                       | AKT, PKA, ERK, p90Rsk, Raf                     | Calcineurin, PP2A, PP1                                     | Zha et al. 1996, Datta et al. 2000, Lizcano et al. 2000, Danial et al. 2003, Springer et al. 2000, Chang et al. 2000, Aylton et al. 2001                                                                               |
|                                                               | BimEL1                   | S87                                  | ζ                                             | regulates BimEL1 apoptotic function                                                                                                                                                  | AKT                                            | unknown                                                    | Qi et al. 2006                                                                                                                                                                                                         |
|                                                               | Caspase-2                | S135 (Xenopus); S139, S164 (Human)   | ζ                                             | prevents apoptotic signals from activating pro-apoptotic Bcl-2 family members upstream of MOM1                                                                                       | CAMKII                                         | PP1                                                        | Nutt et al. 2005, Nutt et al. 2009, Kalabova et al. 2017                                                                                                                                                               |
|                                                               | FOXO                     | FOXO3: T32, T253                     | ζ                                             | cytoplasmic sequestration of FOXO to prevent transcriptional activation of target gene                                                                                               | AKT                                            | PP2A                                                       | Singh et al. 2010, Brunet et al. 1999, Yan et al. 2008                                                                                                                                                                 |
|                                                               | GARNL1                   | T735                                 | not specified                                 | stabilizes IRS2 to propagate insulin signaling                                                                                                                                       | AKT                                            | unknown                                                    | Chen et al. 2014                                                                                                                                                                                                       |
|                                                               | IRS2                     | S573, S1137/1138                     | not specified                                 | required for Glut4 transport to the cell surface                                                                                                                                     | PKA                                            | unknown                                                    | Neukamm et al. 2013, Neukamm et al. 2012                                                                                                                                                                               |
|                                                               | Myosin 1c                | S701                                 | β                                             | plasma membrane localization of PI3K to receive insulin signaling                                                                                                                    | CAMKII                                         | unknown                                                    | Holman et al. 2008, Yip et al. 2008, Munnich et al. 2014                                                                                                                                                               |
|                                                               | p85 (PI3K subunit)       | S83                                  | ζ                                             | sequestration                                                                                                                                                                        | AKT                                            | unknown                                                    | Neal et al. 2012                                                                                                                                                                                                       |
|                                                               | PRAS40                   | T246                                 | not specified                                 | promotes Glut4 trafficking                                                                                                                                                           | AKT, AMPK                                      | unknown                                                    | Chen et al. 2008, Pehmoller et al. 2009                                                                                                                                                                                |
| TBC1D1                                                        | S237, T596               | not specified                        | sequestration to prevent inhibition of mTORC1 | AKT, MK2                                                                                                                                                                             | unknown                                        | Nellist et al. 2002, Cai et al. 2006, Fettweis et al. 2011 |                                                                                                                                                                                                                        |
| TSC2                                                          | S939, S981, S1254, T1462 | ζ                                    | autophagy induction                           | ULK1, AMPK                                                                                                                                                                           | unknown                                        | Weerasekara et al. 2014                                    |                                                                                                                                                                                                                        |
| ATG9                                                          | S761                     | ζ                                    |                                               |                                                                                                                                                                                      |                                                |                                                            |                                                                                                                                                                                                                        |
| hypoxia                                                       | HDAC4                    | S246, S467, S632                     | ζ                                             | sequesters HDAC4 in the cytoplasm and promotes HDAC4 dependent deacetylation of HIF1α                                                                                                | CAMKII, C-TAK1, EMK, hPar-1, MARK2, SIK1, Chk1 | PP2A                                                       | Wang et al. 2000, McKinsey et al. 2000, Linseman et al. 2003, Chang et al. 2005, Dequiedt et al. 2006, Berdeux et al. 2007, Kim et al. 2007, Illi et al. 2008, Yang et al. 2008, Geng et al. 2011 and Tang et al. 2016 |
|                                                               | HIF1α                    | unknown                              | ζ                                             | promotes portal vein tumor thrombus formation and metastasis of hepatocellular carcinoma                                                                                             | unknown                                        | unknown                                                    | Tang et al. 2016                                                                                                                                                                                                       |
|                                                               | MDMX                     | S367                                 | γ                                             | allows activation of p53 and cell cycle arrest                                                                                                                                       | Chk1, Chk2                                     | unknown                                                    | Chen et al. 2005, Lee et al. 2012                                                                                                                                                                                      |
|                                                               | neuroglobin              | S17, S50                             | not specified                                 | increases neuroglobin-catalyzed nitrite to NO reductor                                                                                                                               | ERK1/2                                         | unknown                                                    | Jayaraman et al. 2011                                                                                                                                                                                                  |
|                                                               | REDD1                    | S137                                 | not specified                                 | allows inhibition of mTORC1                                                                                                                                                          | unknown                                        | unknown                                                    | DeYoung et al. 2008                                                                                                                                                                                                    |
|                                                               | ULK1                     | S555                                 | ζ                                             | induction of autophagy                                                                                                                                                               | AMPK                                           | PP2A                                                       | Bach et al. 2011, Egan et al. 2011, Wong et al. 2011                                                                                                                                                                   |
| CAF-1                                                         | unknown                  | β, ζ                                 | unknown                                       | DNA-PK                                                                                                                                                                               | unknown                                        | Hoek et al. 2011                                           |                                                                                                                                                                                                                        |
| DNA damage                                                    | Cdc25A                   | S178, T507                           | β, ε                                          | polyubiquitylation & degradation of Cdc25A                                                                                                                                           | Chk1, Chk2                                     | unknown                                                    | Conklin et al. 1995, Furnari et al. 1997, Sanchez et al. 1997, Chen et al. 2003                                                                                                                                        |
|                                                               | Cdc25B                   | S323, S151, S230                     | ζ, ε, β, η                                    | inhibits Cdc25B to prevent premature progression of the cell cycle                                                                                                                   | Chk1, MK2                                      | unknown                                                    | Mils et al. 2000, Giles et al. 2003, Conklin et al. 1995, Furnari et al. 1997, Sanchez et al. 1997, Manke et al. 2005                                                                                                  |
|                                                               | Cdc25C                   | S216                                 | ζ, ε, γ                                       | inhibits Cdc25C to prevent premature progression of the cell cycle                                                                                                                   | Chk1, MK2, C-TAK1, Chk2, pERK1/2               | PP1                                                        | Peng et al. 1997, Morris et al. 2000, Dalal et al. 2004, Furnari et al. 1997, Sanchez et al. 1997, Manke et al. 2005, Peng et al. 1998, Brown et al. 1999, Eymen et al. 2006, Margolis et al. 2003                     |
|                                                               | Chk1                     | S317, S345, S296                     | ζ, β, γ                                       |                                                                                                                                                                                      | Hus1                                           | PP2A                                                       | Sanchez et al. 1997, Chen et al. 1999, Kasahara et al. 2010, Jiang et al. 2003                                                                                                                                         |
|                                                               | DP-2                     | S42, S53, S56, S58, S59, and/or S64  | ε                                             | inhibits apoptosis; facilitates cell cycle progression; promotes transcriptional activation of target gene                                                                           | unknown                                        | unknown                                                    | Milton et al. 2006                                                                                                                                                                                                     |
|                                                               | E2F1                     | S31                                  | τ                                             | inhibits E2F1 ubiquitination; E2F1 stabilization; promotes apoptosis                                                                                                                 | ATM, ATR                                       | unknown                                                    | Wang et al. 2004                                                                                                                                                                                                       |
|                                                               | Exo1                     | S746                                 | β, γ, ε, ζ, η, τ                              | inhibits binding to PAR and PCNA, promotes fork progression                                                                                                                          | ATR, Chk1                                      | unknown                                                    | Engels et al. 2011, Andersen et al. 2012                                                                                                                                                                               |
|                                                               | ING1                     | S199                                 | η, β, ε, τ, γ, σ, ζ                           | cytoplasmic sequestration, prevents UV-induced transcriptional upregulation of target genes, reduces apoptosis                                                                       | unknown                                        | unknown                                                    | Gong et al. 2006                                                                                                                                                                                                       |
|                                                               | Lats2                    | not S408, may be phospho-independent | γ, β, η, ζ                                    | Lats2 phosphorylates 14-3-3 at S59 in response to UV irradiation to move 14-3-3 to the P-body to facilitate P-body formation                                                         | unknown (or N/A)                               | unknown or N/A                                             | Okada et al. 2011                                                                                                                                                                                                      |
|                                                               | MDMX                     | S367, S342                           | ε, γ, τ, β, ζ, η                              | alters localization of MDMX, degradation of MDMX and activation of p53 in response to DNA damage                                                                                     | Chk1, Chk2, (AMPK in glucose deprivation)      | unknown                                                    | Okamoto et al. 2005, Pereg et al. 2006, LeBron et al. 2006, Jin et al. 2006 [He et al. 2014 for AMPK in response to glucose deprivation]                                                                               |
|                                                               | p53                      | S378, S366, T387                     | ε, γ, τ                                       | increase p53 tetramerization and DNA binding                                                                                                                                         | PKC                                            | unknown                                                    | Waterman et al. 1998; Rajagopalan 2008; Baudier et al. 1992, Stavridi et al. 2001                                                                                                                                      |
|                                                               | PPM1B                    | unknown                              | ε                                             | regulates the PPM1B deactivating dephosphorylation of TAK1                                                                                                                           | unknown                                        | unknown                                                    | Zuo et al. 2010                                                                                                                                                                                                        |
|                                                               | RALT                     | S251                                 | τ, γ, ζ, β                                    | stabilizes RALT protein and slows down RALT trafficking to endosomes; prevents nuclear localization of RALT thereby antagonizing activation of the DNA damage response and apoptosis | Chk1                                           | unknown                                                    | Liu et al. 2012, Takeda et al. 2013, Li et al. 2017                                                                                                                                                                    |
|                                                               | RBM7                     | S136, S204                           | ε, ζ                                          | prevents RBM7 binding to PROMPTs and their subsequent degradation                                                                                                                    | MK2                                            | unknown                                                    | Blasius et al. 2014                                                                                                                                                                                                    |
|                                                               | TAK1                     | T184, T187, S192, S268               | ε                                             | proposed to initially activate and then inhibit TAK1 activation of NFκB translocation and transcriptional modulation                                                                 | TPL2; RIPK3                                    | PPM1B                                                      | Zuo et al. 2010, Tang et al. 2013, Santoro et al. 2017, Xiao et al. 2014; Morioka et al. 2014, Hanada et al. 2001                                                                                                      |
|                                                               | TAZ                      | S89                                  | not specified                                 | sequesters TAZ in the cytosol; inhibits TAZ transcriptional coactivator function                                                                                                     | LATS1/2                                        | PP1A                                                       | Kanal et al. 2000, Lei et al. 2008, Liu et al. 2011                                                                                                                                                                    |
|                                                               | YAP                      | S127                                 | not specified                                 | promotes YAP localization to cytoplasm, preventing YAP's transcriptional coactivator function, and therefore suppresses the induction of apoptosis following DNA damage by cisplatin | LATS1/2                                        | PTPN14                                                     | Vassilev et al. 2001, Basu et al. 2003, Zhao et al. 2007, Liu et al. 2013, Huang et al. 2013, Michaloglou et al. 2013                                                                                                  |
| oxidative stress                                              | ASK1                     | S967                                 | ζ, ε, θ                                       | inhibits ASK1 kinase activity                                                                                                                                                        | IKK                                            | calcineurin, PP2A                                          | Zhang et al. 1999, Goldman et al. 2004, Liu et al. 2006, Hsu et al. 2007, Hsu et al. 2008, Zhou et al. 2009, Cockrell et al. 2010, Seong et al. 2010, Puckett et al. 2013, Petrvalska et al. 2016                      |
|                                                               | FOXO3                    | T32, S253                            | ζ                                             | sequestration in cytosol to prevent activation of cell death gene                                                                                                                    | AKT                                            | PP2A                                                       | Brunet et al. 1999, Singh et al. 2010                                                                                                                                                                                  |
|                                                               | RIP3                     | unknown                              | ζ, ε                                          | allows inhibition of mTORC1 to promote cell death following 5-aminolevulinic acid-based photodynamic therapy                                                                         | unknown                                        | unknown                                                    | Fettweis et al. 2017                                                                                                                                                                                                   |
|                                                               | SeIW                     | N/A                                  | β, γ                                          | Redox regulation of 14-3-3 proteins via exposed Cys on 14-3-3, disrupts interaction of 14-3-3 with ASK1                                                                              | N/A                                            | N/A                                                        | Dikiy et al. 2007, Achmann et al. 2007, Jeon et al. 2013, Jeon et al. 2016                                                                                                                                             |
|                                                               | SOK-1                    | phospho-independent?                 | ζ                                             | SOK-1 phosphorylates 14-3-3; at S58 to trigger dissociation of 1433z-ASK1                                                                                                            | N/A                                            | N/A                                                        | Preisinger et al. 2004, Zhou et al. 2008                                                                                                                                                                               |
